# Supplementary material for: Bio-inspired polydopamine coating as a facile approach to constructing polymer nanocomposites for energy storage
Source: Royal Society of Chemistry journal article supplement (doi:10.1039/c7tc00387k), 2017-01-01
Supplement: c7tc00387k1.pdf [file c7tc00387k1.pdf]

**Bio-inspired Polydopamine Coating as a Facile Approach to Constructing Polymer Nanocomposites for Energy Storage**

*Guanyao Wang, Xingyi Huang,\* and Pingkai Jiang*

Department of Polymer Science and Engineering, Shanghai Key Laboratory of Electrical Insulation and Thermal Aging, Shanghai Jiao Tong University, Shanghai 200240, China

Email: [xyhuang@sjtu.edu.cn](mailto:xyhuang@sjtu.edu.cn)

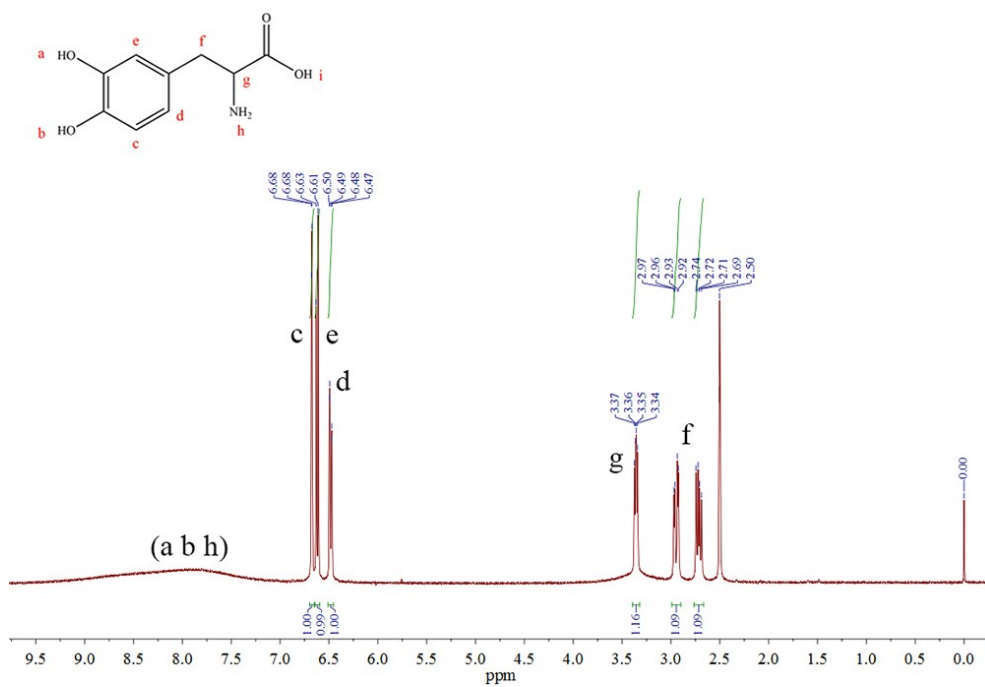

**Fig. S1.** <sup>1</sup>H NMR spectrum of *L*-DOPA. The deuterated solvent is *d*<sub>6</sub>-DMSO.

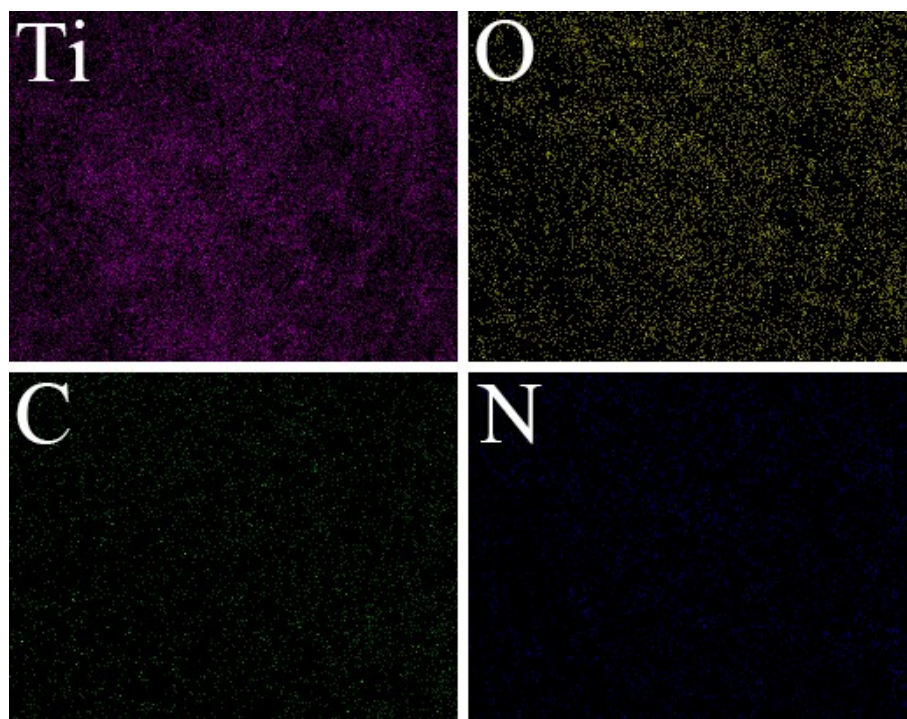

**Fig. S2.** EDX elemental mapping images of *h*-DOPA@TiO<sub>2</sub> NWs: Ti mapping in cyan, O mapping in yellow, C mapping in green, N mapping in blue.

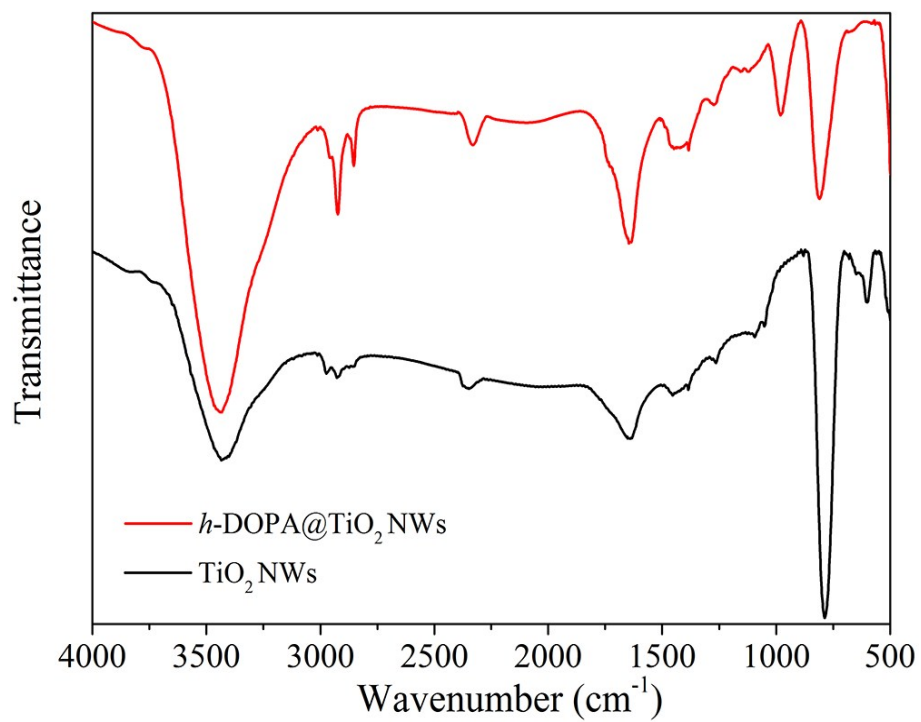

**Fig. S3.** FT-IR spectra of TiO<sub>2</sub> and *h*-DOPA@TiO<sub>2</sub> NWs.

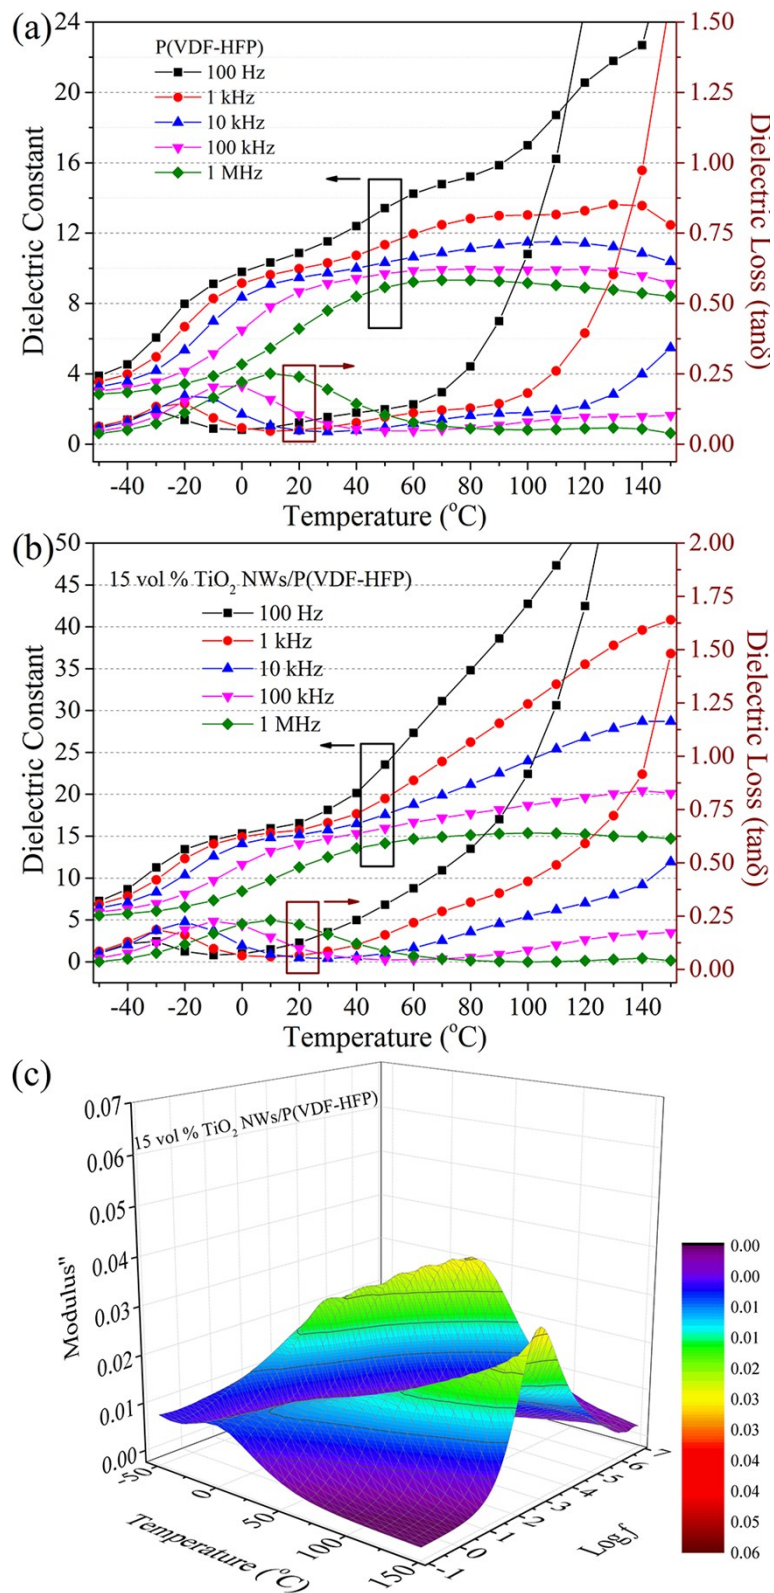

**Fig. S4.** Temperature-dependent dielectric spectra of (a) P(VDF-HFP) and 15 vol %  $\text{TiO}_2$  NWs/P(VDF-HFP) nanocomposites. Frequency dependent of imaginary electric modulus at various temperature of (c) P(VDF-HFP)-based nanocomposites with 15 vol % of  $\text{TiO}_2$  NWs.

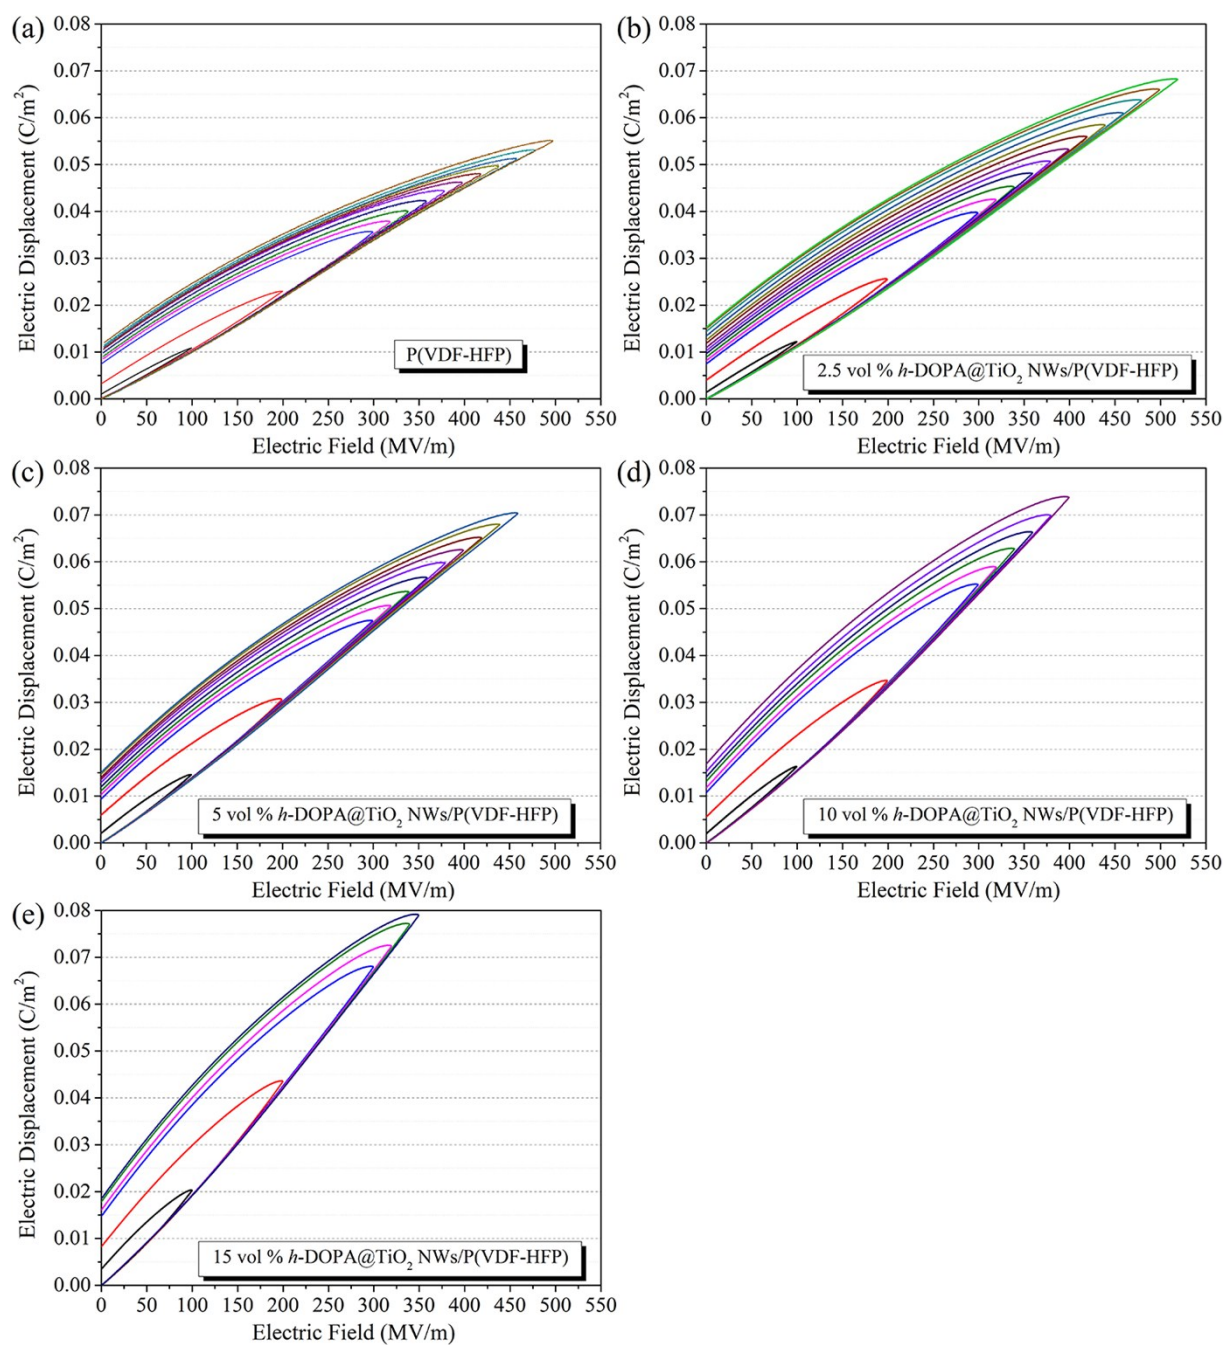

**Fig. S5.** Electric displacement-electric field ( $D$ - $E$ ) loops under unipolar electric fields of 100 Hz for (a) pure P(VDF-HFP) and P(VDF-HFP)-based nanocomposites with (b) 2.5 vol %, (c) 5 vol %, (d) 10 vol %, and (e) 15 vol % of  $h$ -DOPA@TiO<sub>2</sub> NWs.
